# Supplementary material for: Catalytic Activity of Zn(II) Coordination Polymer Based on a Cyclotriphosphazene-Functionalized Ligand for Removal of Organic Dyes
Source: MDPI journal article supplement (doi:10.3390/catal13040756), 2023-04-15
Supplement: s1 [file s1]

## SUPPLEMENTARY MATERIALS

# Catalytic Activity of Zn(II) Coordination Polymer Based on a Cyclotriphosphazene-Functionalized Ligand for Removal of Organic Dyes

Ayşen Orhan Erkovan <sup>1</sup>, Azam Seifi <sup>1,2</sup>, Burcu Topaloğlu Aksoy <sup>1</sup>, Yunus Zorlu <sup>1</sup>, Alireza Khataee <sup>3,4,\*</sup> and Bünyemin Çoşut <sup>1,\*</sup>

<sup>1</sup> Department of Chemistry, Gebze Technical University, 41400 Gebze, Turkey

<sup>2</sup> Department of Applied Chemistry, Faculty of Chemistry, University of Tabriz, 51666-16471 Tabriz, Iran

<sup>3</sup> Department of Environmental Engineering, Faculty of Engineering, Gebze Technical University, 41400 Gebze, Turkey

<sup>4</sup> Research Laboratory of Advanced Water and Wastewater Treatment Processes, Department of Applied Chemistry, Faculty of Chemistry, University of Tabriz, 51666-16471 Tabriz, Iran

\* Correspondence: akhataee@gtu.edu.tr (A.K.); bcosut@gtu.edu.tr (B.Ç.); Tel.: +90 262 605 3099 (A.K.); Tel.: +90 262 605 3015 (B.Ç.)

## TABLE OF CONTENTS

|                                                                                                                                                                                                                |   |
|----------------------------------------------------------------------------------------------------------------------------------------------------------------------------------------------------------------|---|
| <b>Figure S1:</b> Catalytic degradation of RhB using <b>GTU-3</b> along with PMS, [RhB] <sub>0</sub> = 10 ppm (50 mL), [PMS] = 0.5 mM at different catalyst concentrations.....                                | 3 |
| <b>Figure S2:</b> Absorption spectra of RhB degradation for <b>GTU-3</b> , [RhB] <sub>0</sub> = 10 ppm (50 mL), [PMS] = 0.5 mM, catalyst = 0.4 g/L. ....                                                       | 3 |
| <b>Figure S3:</b> Band gap energy of <b>GTU-3</b> calculated from the reflection data.....                                                                                                                     | 4 |
| <b>Figure S4:</b> MALDI MS Spectrum of N <sub>3</sub> P <sub>3</sub> (OC <sub>6</sub> H <sub>4</sub> CH <sub>3</sub> COOCH <sub>3</sub> ) <sub>6</sub> . ....                                                  | 4 |
| <b>Table S1:</b> Selected bond lengths (Å) and bond angles (°) for <b>GTU-3</b> . ....                                                                                                                         | 4 |
| <b>Figure S5:</b> <sup>1</sup> H-NMR spectra of compounds N <sub>3</sub> P <sub>3</sub> (OC <sub>6</sub> H <sub>4</sub> CH <sub>3</sub> COOCH <sub>3</sub> ) <sub>6</sub> in DMSO-d <sub>6</sub> . ....        | 7 |
| <b>Figure S6:</b> MALDI MS Spectrum of <b>H<sub>6</sub>L<sub>1</sub></b> .....                                                                                                                                 | 7 |
| <b>Figure S7:</b> <sup>1</sup> H-NMR spectra of compounds <b>H<sub>6</sub>L<sub>1</sub></b> in DMSO-d <sub>6</sub> .....                                                                                       | 8 |
| <b>Figure S8:</b> FTIR spectrum of the synthesized N <sub>3</sub> P <sub>3</sub> (OC <sub>6</sub> H <sub>4</sub> CH <sub>3</sub> COOCH <sub>3</sub> ) <sub>6</sub> and <b>H<sub>6</sub>L<sub>1</sub></b> ..... | 8 |

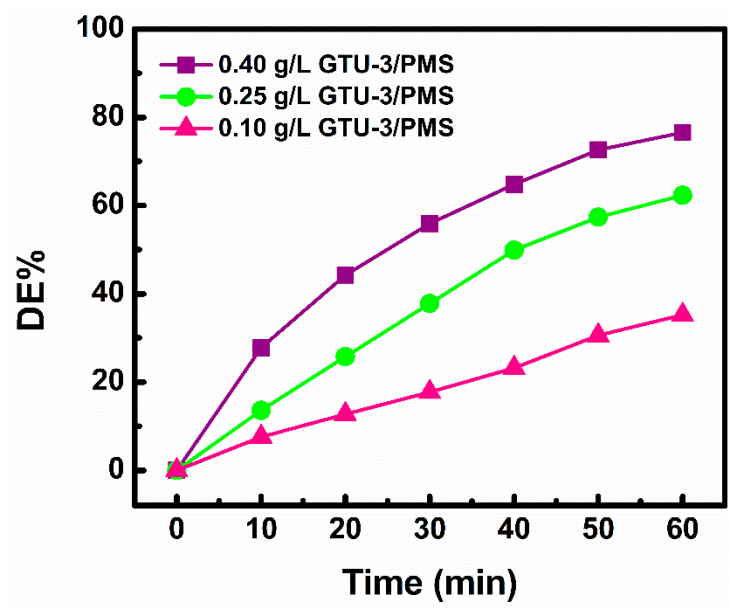

**Figure S1.** Catalytic degradation of RhB using GTU-3 along with PMS,  $[\text{RhB}]_0 = 10 \text{ ppm}$  (50 mL),  $[\text{PMS}] = 0.5 \text{ mM}$  at different catalyst concentrations.

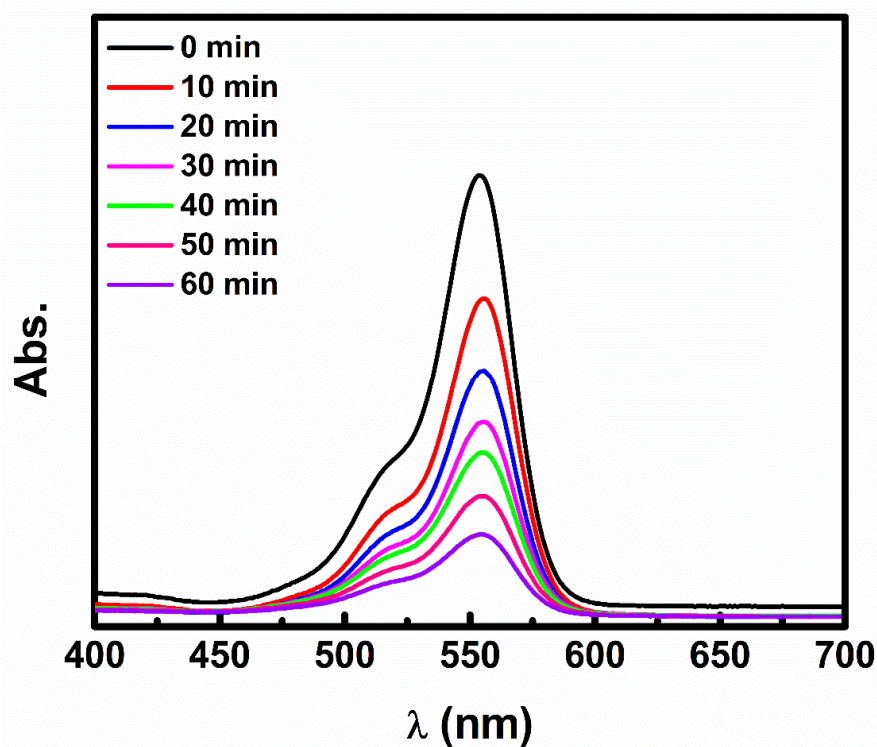

**Figure S2.** Absorption spectra of RhB degradation for GTU-3,  $[\text{RhB}]_0 = 10 \text{ ppm}$  (50 mL),  $[\text{PMS}] = 0.5 \text{ mM}$ , catalyst = 0.4 g/L.

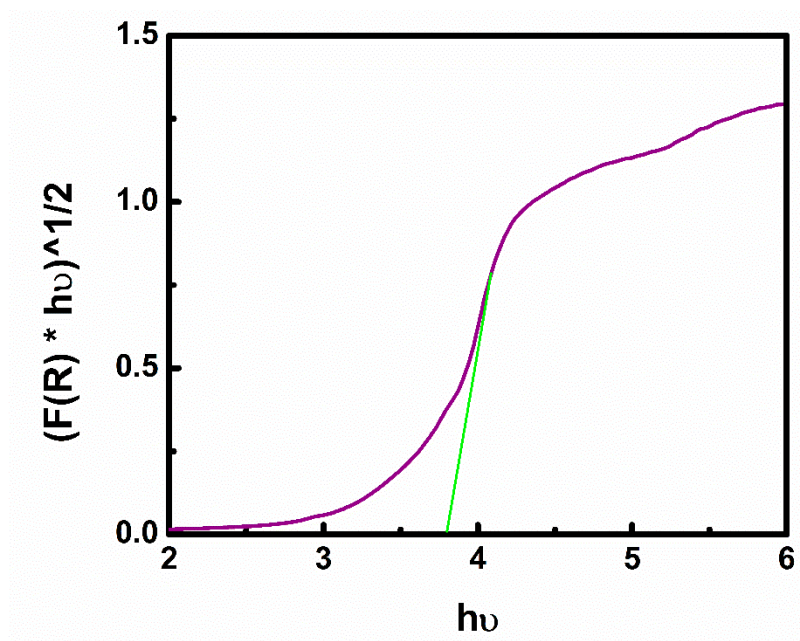

**Figure S3.** Band gap energy of **GTU-3** calculated from the reflection data.

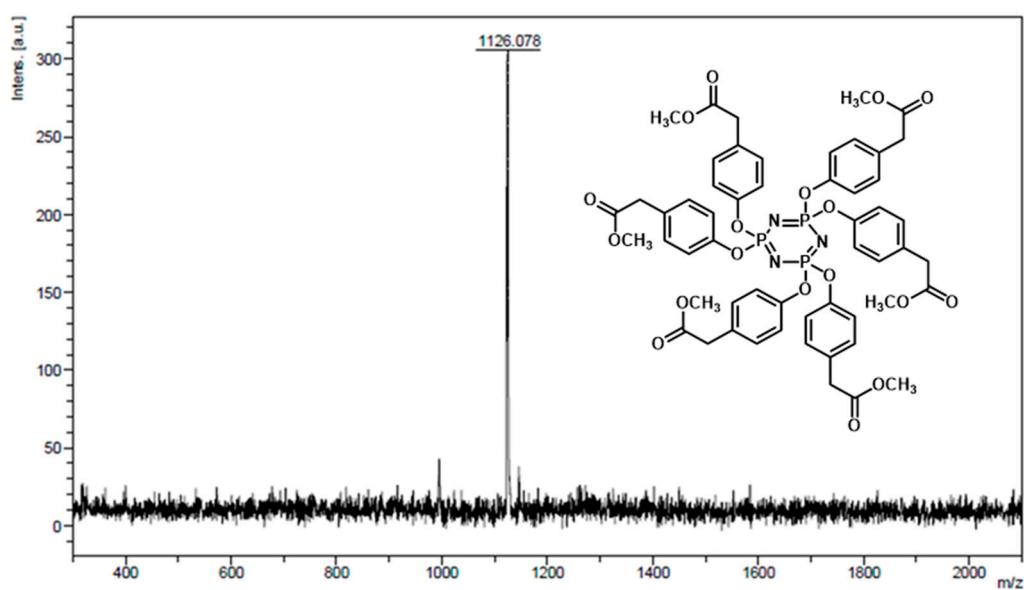

**Figure S4.** MALDI MS Spectrum of  $\text{N}_3\text{P}_3(\text{OC}_6\text{H}_4\text{CH}_3\text{COOCH}_3)_6$ .

**Table S1.** Selected bond lengths (Å) and bond angles (°) for **GTU-3**.

| Bond lengths (Å)        |           |                      |           |                      |           |
|-------------------------|-----------|----------------------|-----------|----------------------|-----------|
| Zn1—O28 <sup>viii</sup> | 2.015 (5) | Zn2—O15 <sup>v</sup> | 1.965 (5) | Zn3—O21              | 2.020 (5) |
| Zn1—O2 <sup>vi</sup>    | 1.977 (5) | Zn2—O20              | 1.936 (5) | Zn3—O33 <sup>i</sup> | 1.985 (5) |

|                                            |            |                                       |           |                                       |           |
|--------------------------------------------|------------|---------------------------------------|-----------|---------------------------------------|-----------|
| Zn1—O10                                    | 1.965 (6)  | Zn2—O19                               | 1.934 (5) | Zn3—N9                                | 2.135 (6) |
| Zn1—N4                                     | 2.122 (14) | Zn2—O6 <sup>v</sup>                   | 1.934 (6) | Zn3—O18                               | 1.959 (7) |
| Zn1—O25 <sup>iv</sup>                      | 2.136 (6)  | Zn5—O27 <sup>iii</sup>                | 1.929 (5) | Zn3—O7 <sup>v</sup>                   | 2.091 (6) |
| Zn4—O30 <sup>i</sup>                       | 1.919 (5)  | Zn5—O34                               | 1.952 (5) | Zn6—O36 <sup>vi</sup>                 | 1.993 (5) |
| Zn4—O1 <sup>ii</sup>                       | 1.957 (5)  | Zn5—O9 <sup>iv</sup>                  | 1.930 (6) | Zn6—O16 <sup>vi</sup>                 | 2.022 (5) |
| Zn4—O37                                    | 1.922 (5)  | Zn5—O24                               | 1.971 (5) | Zn6—O31                               | 1.995 (6) |
| Zn4—O13 <sup>ii</sup>                      | 1.949 (5)  | Zn6—O12 <sup>vii</sup>                | 2.093 (5) | Zn6—N10 <sup>vi</sup>                 | 2.154 (6) |
| P1—N3                                      | 1.571 (7)  | P2—N2                                 | 1.566 (7) | P3—N3                                 | 1.576 (7) |
| P1—N1                                      | 1.565 (6)  | P2—N1                                 | 1.582 (6) | P3—N2                                 | 1.598 (6) |
| P6—N8                                      | 1.572 (6)  | P4—N7                                 | 1.579 (6) | P5—N7                                 | 1.582 (5) |
| P6—N6                                      | 1.578 (5)  | P4—N6                                 | 1.586 (6) | P5—N8                                 | 1.589 (6) |
| <b>Bond angles (°)</b>                     |            |                                       |           |                                       |           |
| O28 <sup>viii</sup> —Zn1—N4                | 86.4 (8)   | O20—Zn2—O15 <sup>v</sup>              | 101.1 (2) | O21—Zn3—N9                            | 88.2 (2)  |
| O28 <sup>viii</sup> —Zn1—O25 <sup>iv</sup> | 85.4 (2)   | O19—Zn2—O15 <sup>v</sup>              | 102.1 (2) | O21—Zn3—O7 <sup>v</sup>               | 83.5 (2)  |
| O28 <sup>viii</sup> —Zn1—N4A               | 89.8 (4)   | O19—Zn2—O20                           | 118.3 (2) | O33 <sup>i</sup> —Zn3—O21             | 137.5 (2) |
| O2 <sup>vi</sup> —Zn1—O28 <sup>viii</sup>  | 133.0 (2)  | O19—Zn2—O6 <sup>v</sup>               | 115.6 (3) | O33 <sup>i</sup> —Zn3—N9              | 88.1 (2)  |
| O2 <sup>vi</sup> —Zn1—N4                   | 92.1 (10)  | O6 <sup>v</sup> —Zn2—O15 <sup>v</sup> | 103.2 (3) | O33 <sup>i</sup> —Zn3—O7 <sup>v</sup> | 83.4 (2)  |
| O2 <sup>vi</sup> —Zn1—O25 <sup>iv</sup>    | 84.3 (2)   | O6 <sup>v</sup> —Zn2—O20              | 113.2 (3) | O18—Zn3—O21                           | 108.0 (3) |
| O2 <sup>vi</sup> —Zn1—N4A                  | 88.5 (4)   | O21—Zn3—N9                            | 88.2 (2)  | O18—Zn3—O33 <sup>i</sup>              | 114.5 (2) |
| O10—Zn1—O28 <sup>viii</sup>                | 110.8 (2)  | O21—Zn3—O7 <sup>v</sup>               | 83.5 (2)  | O18—Zn3—N9                            | 92.5 (2)  |
| O10—Zn1—O2 <sup>vi</sup>                   | 116.2 (2)  | O33 <sup>i</sup> —Zn3—O21             | 137.5 (2) | O18—Zn3—O7 <sup>v</sup>               | 110.9 (2) |
| O10—Zn1—N4                                 | 91.6 (14)  | O33 <sup>i</sup> —Zn3—N9              | 88.1 (2)  | O7 <sup>v</sup> —Zn3—N9               | 156.5 (3) |

|                                          |               |                                               |              |                                               |              |
|------------------------------------------|---------------|-----------------------------------------------|--------------|-----------------------------------------------|--------------|
| O10—Zn1—<br>O25 <sup>iv</sup>            | 103.2 (2)     | O33 <sup>i</sup> —Zn3—<br>O7 <sup>v</sup>     | 83.4 (2)     | O30 <sup>i</sup> —Zn4—<br>O1 <sup>ii</sup>    | 100.6<br>(2) |
| O10—Zn1—N4A                              | 92.0 (5)      | O18—Zn3—<br>O21                               | 108.0<br>(3) | O30 <sup>i</sup> —Zn4—<br>O37                 | 116.2<br>(2) |
| N4—Zn1—O25 <sup>iv</sup>                 | 164.9<br>(13) | O18—Zn3—<br>O33 <sup>i</sup>                  | 114.5<br>(2) | O30 <sup>i</sup> —Zn4—<br>O13 <sup>ii</sup>   | 114.0<br>(2) |
| N4A—Zn1—<br>O25 <sup>iv</sup>            | 164.8 (5)     | O18—Zn3—N9                                    | 92.5 (2)     | O37—Zn4—<br>O1 <sup>ii</sup>                  | 95.5 (2)     |
| O27 <sup>iii</sup> —Zn5—O34              | 102.9 (2)     | O18—Zn3—<br>O7 <sup>v</sup>                   | 110.9<br>(2) | O37—Zn4—<br>O13 <sup>ii</sup>                 | 119.5<br>(2) |
| O27 <sup>iii</sup> —Zn5—O9 <sup>iv</sup> | 119.6 (2)     | O7 <sup>v</sup> —Zn3—N9                       | 156.5<br>(3) | O13 <sup>ii</sup> —Zn4—<br>O1 <sup>ii</sup>   | 106.3<br>(2) |
| O27 <sup>iii</sup> —Zn5—O24              | 119.5 (2)     | O36 <sup>vi</sup> —Zn6—<br>O16 <sup>vi</sup>  | 138.6<br>(2) | O16 <sup>vi</sup> —Zn6—<br>N10 <sup>vi</sup>  | 87.3 (2)     |
| O34—Zn5—O24                              | 105.0 (2)     | O36 <sup>vi</sup> —Zn6—<br>O31                | 111.9<br>(2) | O16 <sup>vi</sup> —Zn6—<br>O12 <sup>vii</sup> | 85.2 (2)     |
| O9 <sup>iv</sup> —Zn5—O34                | 93.8 (2)      | O36 <sup>vi</sup> —Zn6—<br>N10 <sup>vi</sup>  | 89.4 (2)     | O31—Zn6—<br>O16 <sup>vi</sup>                 | 109.1<br>(2) |
| O9 <sup>iv</sup> —Zn5—O24                | 110.8 (2)     | O36 <sup>vi</sup> —Zn6—<br>O12 <sup>vii</sup> | 100.0<br>(2) | O31—Zn6—<br>N10 <sup>vi</sup>                 | 87.4 (2)     |
| P1—N3—P3                                 | 123.6 (4)     | N3—P3—N2                                      | 117.0(4)     | O31—Zn6—<br>O12 <sup>vii</sup>                | 89.7 (2)     |
| P2—N2—P3                                 | 121.0 (4)     | N2—P2—N1                                      | 118.0(4)     | O12 <sup>vii</sup> —Zn6—<br>N10 <sup>vi</sup> | 170.6<br>(3) |
| P1—N1—P2                                 | 122.8 (4)     | N1—P1—N3                                      | 115.9<br>(4) | N7—P4—N6                                      | 117.5(3)     |
| P4—N7—P5                                 | 120.2(4)      | N7—P5—N8                                      | 116.8(3)     | N8—P6—N6                                      | 118.3(3)     |
| P6—N8—P5                                 | 121.6(3)      | P6—N6—P4                                      | 120.7(4)     |                                               |              |

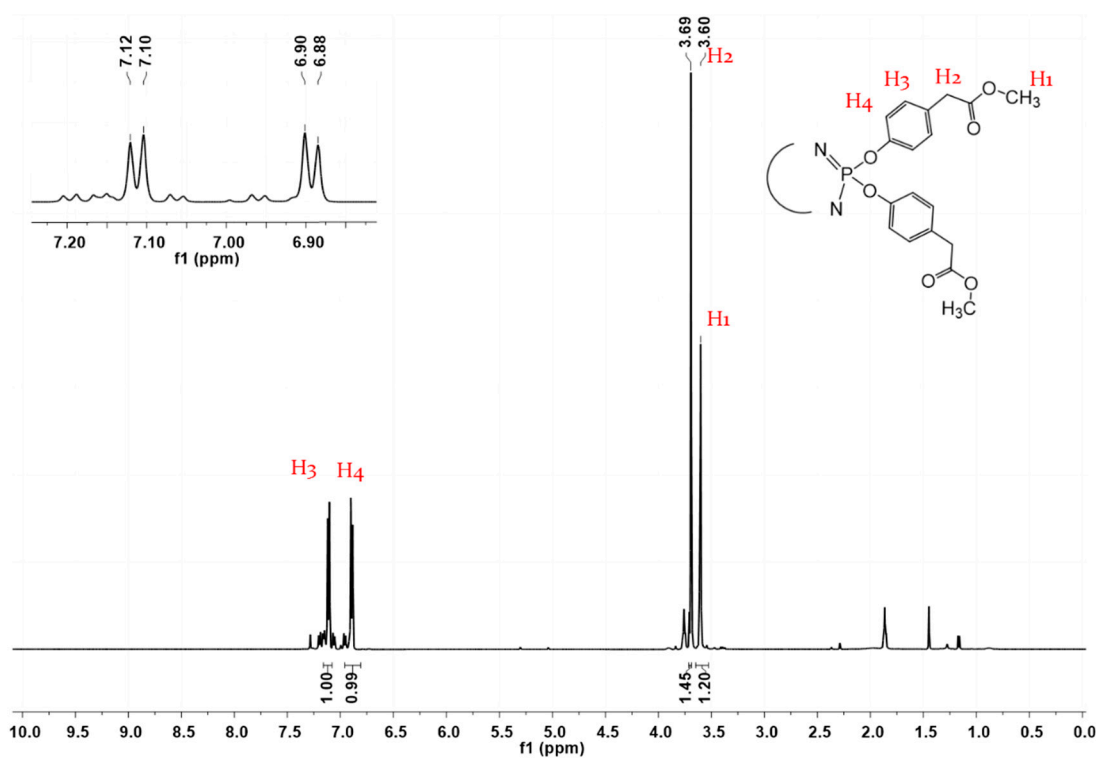

**Figure S5.**  $^1\text{H}$ -NMR spectra of compounds  $\text{N}_3\text{P}_3(\text{OC}_6\text{H}_4\text{CH}_2\text{COOCH}_3)_6$  in  $\text{DMSO-d}_6$ .

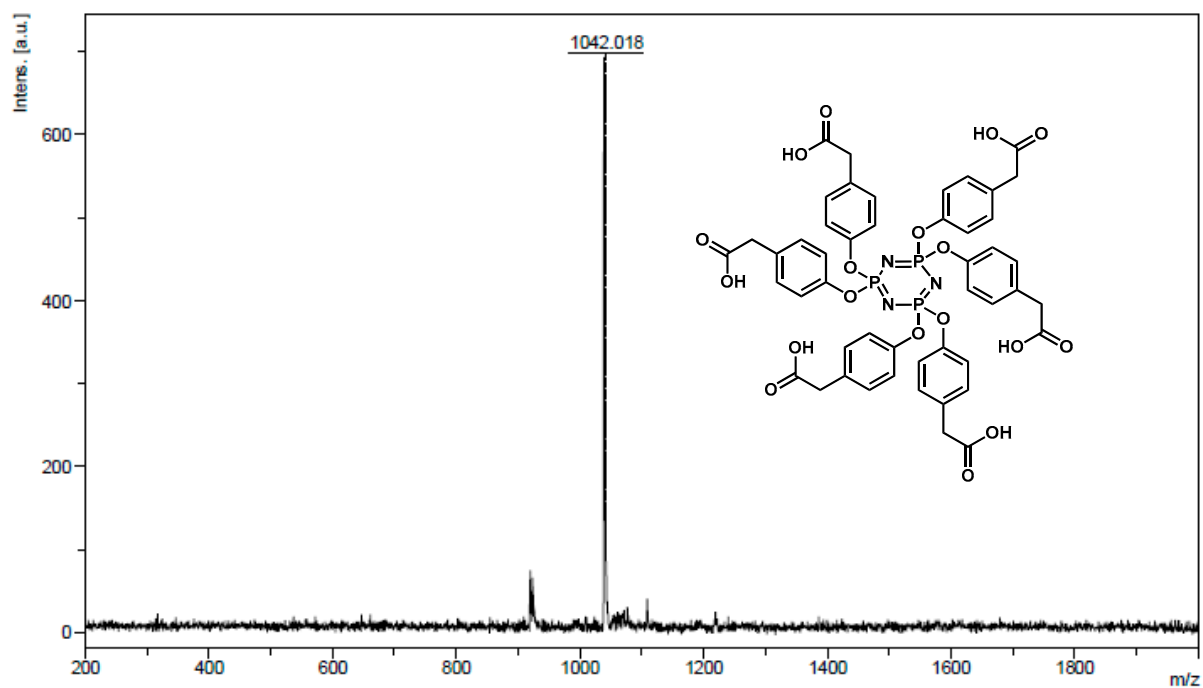

**Figure S6.** MALDI MS Spectrum of  $\text{H}_6\text{L}_1$ .

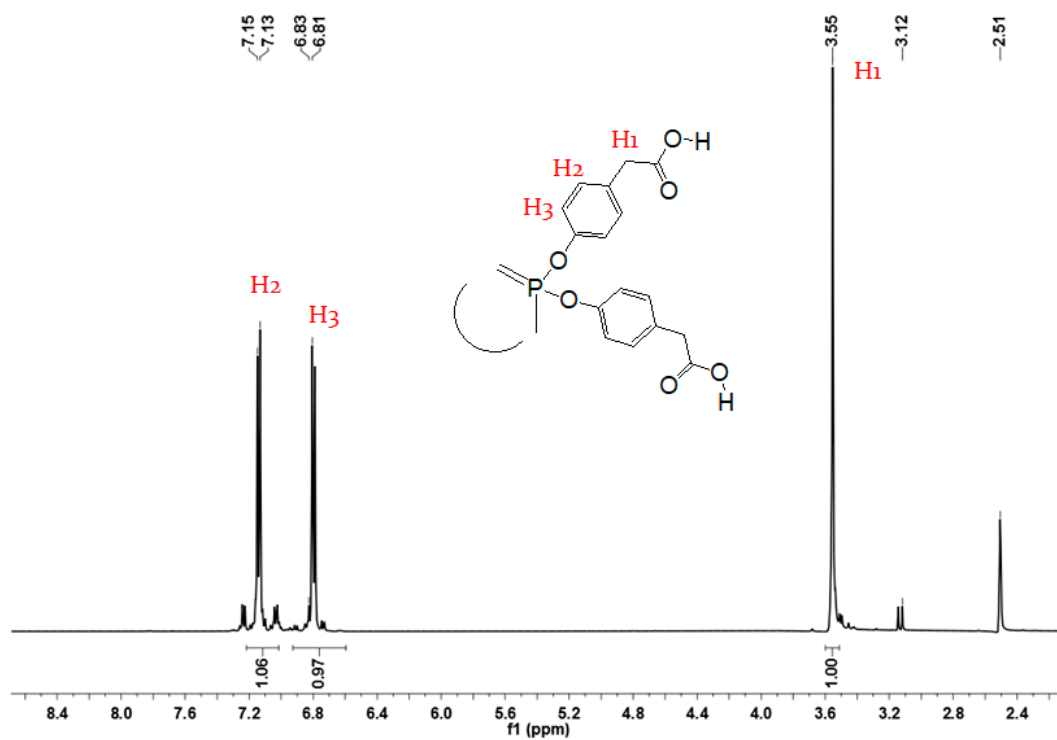

Figure S7.  $^1\text{H}$ -NMR spectra of compounds  $\text{H}_6\text{L}_1$  in  $\text{DMSO-d}_6$ .

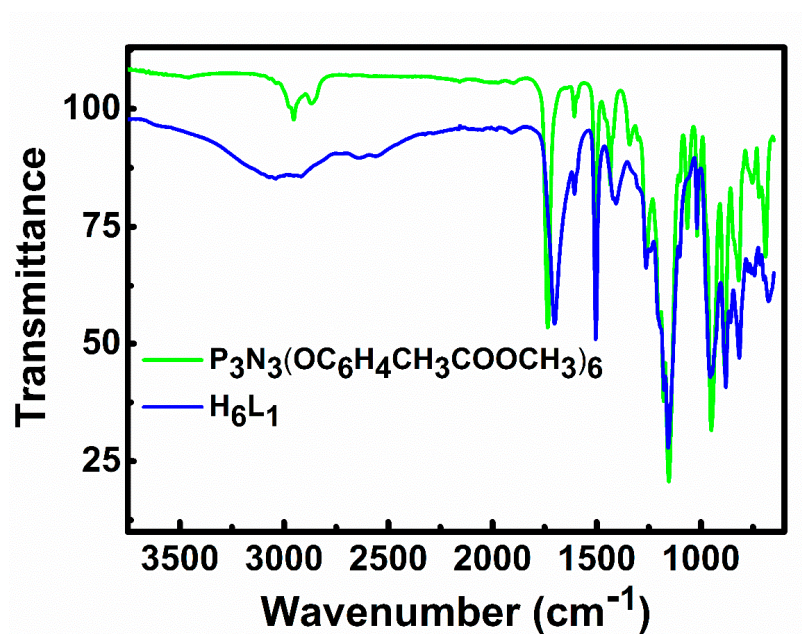

Figure S8. FTIR spectrum of the synthesized  $\text{N}_3\text{P}_3(\text{OC}_6\text{H}_4\text{CH}_3\text{COOCH}_3)_6$  and  $\text{H}_6\text{L}_1$ .
